# Supplementary material for: Geographical Variation in the Quality of Chimonobambusa rigidula Bamboo Shoots and Its Relationship with Site Environment
Source: Research Square preprint supplement (doi:10.21203/rs.3.rs-7243702/v1), 2025-08-28
Supplement: Supplementary file 1 [file 12e081b5940f19454e789f85.xlsx]

## Sheet: Table S1
Table S1. Morphological traits of C. rigidula bamboo shoots
Sampling site	Weight (g)	Shoot length (cm)	Basal diameter（cm）	Edible amount (g)
MC1	201.42	34.42	2.17	124.34
MC2	196.52	33.31	2.06	119.42
MC3	205.33	35.74	2.19	120.8
MB1	168.82	32.49	1.67	101.41
MB2	175.77	33.32	1.79	109.58
MB3	177.84	33.95	1.84	112.12
PS1	205.78	35.37	2.32	125.7
PS2	200.06	33.53	2.08	118.76
PS3	206.77	35.21	2.29	123.46

## Sheet: Table S2
Table S2.The basic nutritents in C. rigidula bamboo shoots from different areas
Sampling site	Cellulose (g·100g-1)	Lignin (g·100g-1)	AW (%)	Ash (g·100g-1)	ASC acid (mg·100g-1)	SS (g·100g-1)	Protein (g·100g-1)	Oxalic acid (mg·100g-1)	Tf (mg·1000g-1)	Tannin (mg·1000g-1)	Starch (g·100g-1)
MC1	18.1	12.6	91.9	0.905	8.2	0.4	2.79	5.31	61.1	596	0.9
MC2	18.9	12.9	91.4	0.914	7.85	0.32	2.66	5.33	55.8	555	1.05
MC3	19.5	12.3	91.3	0.908	7.66	0.34	2.58	5.46	53.6	578	1.12
MB1	15.6	14.9	91.7	1.4	13.2	0.37	2.64	4.22	52.1	976	1.04
MB2	16.3	14.3	91.8	1.36	11.1	0.28	2.63	4.39	45.2	952	1.14
MB3	16.1	14.8	92	1.34	11	0.29	2.68	4.23	43.3	932	1.23
PS1	17.8	12.8	91.6	1.02	11.9	0.56	2.86	4.29	58.4	614	0.97
PS2	18.5	12.9	91.8	0.998	9.24	0.44	2.88	4.11	50.3	602	0.9
PS3	17.9	13.5	90.9	0.987	9.32	0.46	2.74	4.08	50.2	617	0.94

## Sheet: Table S3
Table S3.The mineral content in C. rigidula bamboo shoots from different areas
Sampling site	Potassium (K) (mg·1000g-1)	Sodium (Na) (mg·1000g-1)	Calcium (Ca) (mg·1000g-1)	Iron (Fe) (mg·1000g-1)	Zinc (Zn) (mg·1000g-1)	Copper (Cu) (mg·1000g-1)	Magnesium (Mg) (mg·1000g-1)	Selenium (Se) (mg·1000g-1)
MC1	6163	2.23	393	4.09	10.1	2.14	207	—
MC2	6241	2.89	374	4.48	12.1	2.14	210	—
MC3	6274	2.45	379	4.69	11.5	1.96	208	—
MB1	5804	1.3	352	3.72	8.88	2.24	210	—
MB2	5914	1.5	349	3.31	8.77	2.08	213	—
MB3	5811	1.98	362	3.05	8.65	2.36	223	—
PS1	5054	1.88	358	3.2	8.9	2.58	200	—
PS2	4988	1.89	365	2.88	8.56	2.98	198	—
PS3	4879	1.45	361	2.74	8.45	3.01	208	—

## Sheet: Table S4
Table S4.The amino acid content in C. rigidula bamboo shoots from different areas
Sampling site	Asp (mg·100g-1)	Thr (mg·100g-1)	Ser (mg·100g-1)	Glu (mg·100g-1)	Gly (mg·100g-1)	Ala (mg·100g-1)	Val (mg·100g-1)	Cystine (mg·100g-1)	Met (mg·100g-1)	Ile (mg·100g-1)	Leu (mg·100g-1)	Tyr (mg·100g-1)	Pheny (mg·100g-1)	GABA (mg·100g-1)	Lys (mg·100g-1)	His (mg·100g-1)	Arg (mg·100g-1)	Pro (mg·100g-1)
MC1	19.4	14.8	31.1	80.5	6.6	26.5	25.9	1.35	6.8	19.5	25.1	16.1	22.3	31.9	24.9	12.4	24.1	10.1
MC2	18.3	15.2	30.6	78.2	5.4	23.2	26.2	1.01	5.99	20.3	25.3	15.3	23.2	33.2	20.5	14.3	22.1	12.1
MC3	19.8	13.2	33.6	82.2	5.1	23.2	25.3	0.98	6.33	22.2	26.2	15.9	22.2	34.8	22.7	13.9	22.7	11.4
MB1	17.1	22	50	152	8.28	31	38.3	2.17	9.82	23.6	29.3	38.6	37.1	21.5	25.9	20.2	29.4	14.3
MB2	15.6	20.9	50.2	152.2	8.7	28.2	36.3	2	10.8	25.9	28.5	43.1	41.4	20.7	24	20.9	26.2	13.6
MB3	14.9	19.1	52.3	156	8.5	30.1	40.1	2	9.8	27.7	29.5	43.2	40.9	20.4	25.5	21.4	24.3	12.5
PS1	14.1	17.1	33.8	166	7.41	23.7	21.8	2.22	7.37	15.7	22.8	17.4	18.8	28.5	20.2	18.3	19.6	11.7
PS2	15.1	19	34	168.2	7.9	23.6	22	2.3	7.3	17	24.6	17.7	18.4	31.6	22.3	17.5	17.8	10.5
PS3	14.8	20.5	30.7	153.9	7	23.8	24.1	2.4	8.1	16.6	27.1	16.1	16.3	29.5	22	18.7	18.7	11.7

## Sheet: Table S5
Table S5.The climate factors in different areas
Sampling site	Altitude（m）	Cumulative sunshine duration in 2024（h）	Mean annual temperature in 2024（℃）	Average annual rainfall in 2024（mm）	Relative humidity in Sept. 2024 (%)	Average temperature in Sept. 2024 （℃）	Minimum temperature in Sept. 2024 （℃）	Maximum temperature in Sept. 2024 （℃）	Precipitation in Sept. 2024 (mm)
MC	1280	998.4	13.8	1353.2	79	21.7	10.4	32.2	159.3
MB	1241	926.2	14.6	1289.6	81	22.1	12	33.6	167.8
PS	1237	1317.9	14.6	817.2	77	23	10.6	33.1	85.2

## Sheet: Table S6
Table S6.The soil physicochemical properties in different areas
Sampling site	pH	Organic matter(g/kg)	Total nitrogen(%)	Total phosphorus (g/kg)	Total potassium (g/kg)	Available phosphorus (mg/kg)
MC1	6.02	97.9	0.421	0.91	34.6	4
MC2	5.98	100.1	0.431	0.93	35.7	4.3
MC3	6.05	96.1	0.387	0.86	32.9	3.9
MB1	5.79	39.1	0.251	0.74	14.4	0.732578
MB2	5.63	37.9	0.275	0.81	14.6	0.8
MB3	5.8	39.5	0.247	0.76	15.8	0.7
PS1	4.46	84.9	0.43	1.18	20.8	9.8
PS2	4.49	84.1	0.461	1.24	19.5	10.1
PS3	4.41	86.1	0.44	1.22	21.9	8.9
